# Supplementary material
Source: PubMed Central journal article supplement (PMC4908505)

## **SUPPORTING INFORMATION**

### **Rapid Discovery of Functional Small Molecule Ligands against Proteomic Targets through Library-Against-Library Screening**

Chun-Yi Wu, Don-Hong Wang, Xiaobing Wang, Seth M. Dixon, Liping Meng, Sara Ahadi, Daniel H. Enter, Chao-Yu Chen, Jason Kato, Leonardo J. Leon, Laura M. Ramirez, Yoshiko Maeda, Carolina F. Reis, Brianna Ribeiro, Brittany Weems, Hsing-Jien Kung and Kit S. Lam

#### ***TABLE OF CONTENTS***

- Materials
- Nuclear Magnetic Resonance (NMR)
- MTT (3-(4,5-Dimethylthiazol-2-yl)-2,5-diphenyltetrazolium bromide) Assay for Measuring IC<sub>50</sub> for each Small Molecule against Jurkat Cells and HepG2 Cells
- EIF5B nucleotide and protein sequences
- MS Decoding Matlab Scripts
- Supporting Information Tables
- Supporting Information Scheme
- Supporting Information Figures

## Materials

*N, N*-dimethylformamide (DMF), dichloromethane (DCM), methanol, bovine serum albumin (BSA) and all of the plastic and glassware were purchased from Fisher Scientific (Pittsburgh, PA) unless otherwise noted. All building blocks and other reagents were purchased from Sigma-Aldrich (St. Louis, MO) unless otherwise stated. TentaGel S NH<sub>2</sub> resin (0.26 mmol/g loading, 90 μm diameter) was purchased from Rapp Polymere GmbH (Tubingen, Germany). Rink amide MBHA resin, HOBt (1-hydroxybenzotriazole), HBTU (2-(1H-tribenzotriazol-1-yl)-1,1,3,3-tetramethyluronium hexafluorophosphate), and Fmoc-OSu were purchased from GL Biochem (Shanghai, China). M13 phage display Jurkat cell cDNA library was purchased from Spring Biosciences (Pleasanton, CA; discontinued). Anti-M13 monoclonal antibody was purchased from GE Healthcare Life Sciences (Piscataway, NJ). Rabbit anti-mouse IgG (H+L) –AP was purchased from Invitrogen (Carlsbad, CA). T7select human liver tumor cDNA library and polymerase chain reaction (PCR) reagents were both purchased from EMD Biosciences (Brookfield, WI). 96-well Genemate<sup>®</sup> semi-skirted PCR plates were purchased from ISC Bioexpress (Kaysville, UT). 96-well microplate adhesive seals were purchased from USA Scientific (Orlando, FL). PCR product cleaning reagent ExoSAP-IT was purchased from USB (Cleveland, OH). Dimethylsulfoxide (DMSO) was purchased from American Type Culture Collection (ATCC, Manassas, VA). RPMI 1640 media was purchased from Invitrogen (Carlsbad, CA). TNT<sup>®</sup> T7 Quick Coupled Transcription/Translation System, Luciferase control T7 DNA, Dual-Luciferase<sup>®</sup> Reporter (DLR<sup>™</sup>) Assay System were purchased from Promega (Madison, WI). Sodium dodecyl sulfate

polyacrylamide gel electrophoresis (SDS-PAGE) gels, sample loading buffer, running buffer, staining buffer and the running system were purchased from PAGEgel (now Expedition in San Diego, CA) and Bio-Rad (Hercules, CA). Precision Plus Protein Kaleidoscope standards, goat anti-mouse IgG-HRP, Western Blot absorbent filter paper, Immun-Blot PVDF membrane and semi-dry blotting system were also purchased from Bio-Rad (Hercules, CA). EIF5B purified MaxPab mouse polyclonal antibody (B01P) was purchased from Abnova (Taoyuan County, Taiwan). High Capacity NeutrAvidin Agarose Resin was purchased from Pierce (Rockford, IL). Protease inhibitor cocktail (EDTA free) was purchased from Roche (Indianapolis, IN).

### **Nuclear Magnetic Resonance (NMR)**

$^1\text{H}$  NMR spectra were recorded at 300 MHz for  $^1\text{H}$  NMR and 75 MHz for  $^{13}\text{C}$  NMR, using  $\text{CDCl}_3$  as the solvent and TMS as internal standard (0.00 ppm). MS was recorded in the positive ion mode on a Qtrap spectrometer.

3-(1-(1-(naphthalen-2-yl)ethyl)-2-(3-phenoxyphenyl)-1*H*-benzo[*d*]imidazol-5-yl)-3-(3-propylureido)propanamide (**LWW31**):  $^1\text{H}$  NMR (300 MHz,  $\text{CDCl}_3$ )  $\delta$  7.87-7.92 (m, 2H), 7.25-7.70 (m, 15H), 7.12-7.18 (m, 2H), 6.89-6.98 (m, 2H), 6.53-6.56 (m, 1H), 5.83 (s, 1H), 5.26-5.28 (m, 2H), 2.80-2.89 (m, 2H), 2.45-2.53 (m, 1H), 2.23 (t, 2H,  $J = 6.3$  Hz), 1.25 (bs, 3H), 0.83-0.88 (m, 1H), 0.71 (dt, 3H,  $J = 7.5$  Hz, 2.7 Hz);  $^{13}\text{C}$  NMR (75 MHz,  $\text{CDCl}_3$ )  $\delta$  172.8, 157.9, 154.1, 148.9, 148.7, 133.1, 131.3, 131.1, 130.5, 130.4, 129.8, 129.4, 129.2, 128.8, 128.7, 126.6, 126.3,

125.4, 123.9, 123.5, 123.4, 122.6, 121.5, 120.5, 118.9, 117.1, 114.0, 113.5,  
112.4, 54.1, 51.0, 40.9, 28.7, 22.0, 19.3, 10.2; MS: 612.3 (M + H<sup>+</sup>)

**MTT (3-(4,5-Dimethylthiazol-2-yl)-2,5-diphenyltetrazolium bromide) Assay  
for Measuring IC<sub>50</sub> for each Small Molecule against Jurkat Cells and HepG2  
Cells**

About 10,000 cells were seeded in each well of the 96-well microtiter plate with 100 µL of RPMI 1640 (for Jurkat Cells) or EMEM (for HepG2 Cells) media containing 10% of Fetal Bovine Serum (FBS) and 1% of Penicillin/Streptomycin solution (P/S). To measure the IC<sub>50</sub>, each compound dissolved in dimethylsulfoxide (DMSO) was diluted in the media mentioned above to the desired concentrations with 0.1% of DMSO. The microtiter plate was incubated in a 37°C incubator at 5% CO<sub>2</sub> for 72 hours. Ten microliter of 5 mg/mL MTT solution in PBS was added to the cell culture and incubated in the same incubator for another 4 hours. The resulting blue precipitation was dissolved by adding 100 µL of 0.04 N HCl in isopropanol and the color density of the solution was measured with a Tecan 96 well plate reader (Seestrasse, Switzerland) at 570 nm with reference wavelength of 650 nm. The dose-response curves were then plotted and the percentage of the surviving cells at each concentration was calculated by using the formula:  $100\% * (OD_{\text{sample}} - OD_{\text{blank}}) / (OD_{\text{control}} - OD_{\text{blank}})$ .

**EIF5B nucleotide and protein sequences**

Nucleotide sequence (from 5' end of the complement strand), underlined

sequence matched the database through BLAST search:

TTGGGTTCTGCCTGCCAGCTGCACTGATGCTGCCCTCATCTCTCTGCCCA  
ACCCTTCCCTCAAAGCTTAGCCAGAGCTTCTTGCATAGCTTTAACAGTGGCT  
TTGCTAGGTCCTTTTTTCTTCTCTTTCTCTTTTTCTTCCTTTTCTCCTTTCTTTT  
TCTTCTTATCTTTCTTCTTTTTGTCTCCTTCATTGTCATCTTCTGCAGCTGTGG  
GAGTCTCTGCTTTCTTTCAGAGGCAGGAATACTCCAGTATCAACAGTCAC  
TTTGATTTTACAGTTTCTTCTTCAAATTCCTTTGARATTCCTTTTGTTTACT  
CTGATCCTTTTTACCTGTTTCTAACTCTTCTTTTTCTTTCARCTTCCGCAGTTT  
CGCTTTTTTCGCTTGAATTCGGATC

Nucleotide sequence (reverse and complement strand of the above sequence):

GATCCGAATTCAAGCGAAAAAGCGAAACTGCGGAAGYTGAAAGAAAAAGAA  
GAGTTAGAAACAGGTAAAAAGGATCAGAGTAAACAAAAGGAATYTCAAAGGA  
AATTTGAAGAAGAAACTGTAAAATCCAAAGTGACTGTTGATACTGGAGTAATT  
CCTGCCTCTGAAGAGAAAGCAGAGACTCCCACAGCTGCAGAAGATGACAAT  
GAAGGAGACAAAAAGAAGAAAGATAAGAAGAAAAAGAAAGGAGAAAAGGAA  
GAAAAAGAGAAAGAGAAGAAAAAAGGACCTAGCAAAGCCACTGTAAAGCTA  
TGCAAGAAGCTCTGGCTAAGCTTTGAGGGAAGGGTTGGGCAGAGAGATGAG  
GGGCAGCATCAGTGCAGCTGGCAGGCAGAACCCAA

Protein sequence:

DPNSSEKAKLRKLKEKEELETGKKDQSKQKEXQRKFEETVKSSKVTVDTGVIPA  
SEEKAETPTAAEDDNEGDKKKKDKKKKGEKEEKEKEKKKGPSKATVKAMQEA

## LAKL\*GKGWAER\*GAASVQLAGRTQ

### **MS decoding MATLAB scripts**

%Bead Decoder Program for Lam Lab, September 7th, 2007

%Written by Daniel Enter (denter@northwestern.edu) for Jimmy Chun-Yi Wu, Dr. Xiaobing Wang, and Dr. Kit Lam

%Green text is for commenting, black text is the program

%To purchase Matlab software for UC Davis, see  
%<http://iet.ucdavis.edu/computing/software.cfm>

%This program decodes mass spectrometry ASCII files of beads where the  
%highest peak is m2, and uses a system of three equations to calculate and  
%display between 1 and 2 (rarely more) values for r1, m1, r2, m2, r3 and m3

%System of Equations:  $r1 = m1 - 753$ ,  $r2 = m2 - r1 - 810$ ,  $r3 = m3 - m2 - 42$   
%Constants in the above equation can be found and modified (Ctrl-F for the constants)

%Cutoffs for the program (Can be changed by user, original values: brominecutoff =  
0.4;intensitycutoffsecondmax = 0.5;intensitycutoffindexr1 = 0.1;intensitycutoffindexr3 =  
0.1;intensitycutoffbromine = 0.6;rcutoff = 1;

```
brominecutoff = 0.4;
intensitycutoffsecondmax = 0.5;
intensitycutoffindexr1 = 0.05;
intensitycutoffindexr3 = 0.05;
intensitycutoffbromine = 0.3;
rcutoff = 1;
```

%Library of small molecules (extra entries of r1, r2, or r3 can be added, originally 24  
for r1, 22 for r2, 32 for r3)

```
%r1
r1(1) = 59.11;
r1(2) = 71.12;
r1(3) = 73.14;
r1(4) = 75.11;
r1(5) = 87.17;
r1(6) = 89;
r1(7) = 101.15;
r1(8) = 107.16;
r1(9) = 108.14;
r1(10) = 114;
r1(11) = 114;
r1(12) = 127.3;
r1(13) = 128.22;
r1(14) = 130.19;
r1(15) = 131.22;
r1(16) = 139.17;
r1(17) = 142.2;
r1(18) = 143.14;
r1(19) = 151.17;
r1(20) = 156.27;
r1(21) = 162;
r1(22) = 171.24;
r1(23) = 190.29;
r1(24) = 55.08;
```

```
%r2
r2(1) = 107.11 ;
r2(2) = 120.15;
r2(3) = 122.12;
r2(4) = 124.11;
r2(5) = 134.18;
r2(6) = 142.11;
```

```
r2(7) = 149.19;
r2(8) = 150.13;
r2(9) = 157.17;
r2(10) = 166.18;
r2(11) = 174.12;
r2(12) = 178.19;
r2(13) = 180.21;
r2(14) = 182.18;
r2(15) = 186.21;
r2(16) = 196.07;
r2(17) =198.22;
r2(18) = 194.23;
r2(19) = 206.24;
r2(20) = 212.25;
r2(21) = 254.33;
r2(22) = 266.22;
```

```
%r3
r3(1) = 58 ;
r3(2) = 67;
r3(3) = 69;
r3(4) = 72;
r3(5) = 86;
r3(6) = 98;
r3(7) = 100;
r3(8) = 102;
r3(9) = 105;
r3(10) = 108;
r3(11) = 112;
r3(12) = 116;
r3(13) = 120;
r3(14) = 123;
r3(15) = 126;
r3(16) = 130;
r3(17) = 134;
r3(18) = 138;
r3(19) = 141;
r3(20) = 150;
r3(21) = 157;
r3(22) = 164;
r3(23) = 170;
r3(24) = 176;
r3(25) = 180;
r3(26) = 185;
r3(27) = 188;
r3(28) = 192;
r3(29) = 196;
r3(30) = 210;
r3(31) = 232;
r3(32) = 267;
```

```
%Defining blank matrices for all variables to identify m1, r1, m2, r2, m3, r3
```

```
m1index = 0;
m1 = 0;
m1poss = 0;
m1close = 0;
m1onlylposs = 0;
```

```
r1close = 0;
r1onlylposs = 0;
```

```
m2index = 0;
m2 = 0;
m2poss = 0;
```

```
r2close = 0;
r2onlylposs = 0;
```

```
m3index = 0;
m3 = 0;
m3poss = 0;
```

```

m3close = 0;
m3only1poss = 0;

r3close = 0;
r3only1poss = 0;
brominepair2index = 1;
note = 0;

%To save previous possibilities in case increasing sensitivity 1% decreases solutions
from >2 to zero (values set to 1 so this does not happen in the first round), it will use
previous solutions (only case where >2 solutions should be displayed)
prevr2only1poss = 1;
prevr3only1poss = 1;
prevm2only1poss = 1;
prevm3only1poss = 1;
prevr1final = 1;
prevm1final = 1;

%Setting conditions for while...end loop to finish if between 1 and 2 possibilites for
r2,m2,r3,m3, but r1, m1 depends on r2, m2
done= 0;
doner(1) = false;
doner(2) = false;

%Setting molecular weight and intensity to be the columns of chosen dataset
mw = data(:,1);
intensity = data(:,2);

%Graphing Mass Spec
plot(mw, intensity);
xlabel('Molecular Weight');
ylabel('Intensity');

%Decoding m2

%Find max intensity
maxint=max(intensity) ;

%Checking which index is the max intensity, display note if not in m2 range
maxindex = 0 ;
while maxindex == 0
    for index = 1:(size(mw))
        if abs(mw(index) - 800) < 0.1
            m1start = index;
        end
        if intensity(index) == maxint;
            if (min(r1) + min(r2) +800) > mw(index)
                note = true;
            end
            if mw(index) >(max(r1) + max(r2) +820)
                note = true;
            end
            maxindex = index;
        end
    end
end

%Setting an intensity cutoff for the bromine pair of max intensity
intensitycutoffmax = intensity(maxindex) * intensitycutoffsecondmax;

%Cycles through all indices from maxindex downward, and sees if they are 2 mw away from
the mw of maxindex, and of required intensity calculated above, if so, saves their index
and mw
for index = maxindex-200:1:maxindex + 200
    if 2 - brominecutoff <= abs(mw(maxindex) - mw(index)) & abs(mw(maxindex) - mw(index))
<= 2 + brominecutoff
        if intensity(index) >= intensitycutoffmax

```



```

        brominepair2index = index;
        brominepair2mw = mw(index);
    end
end
end

%Assigning m2 value to whichever has lower mw of the most intense bromine pair
if maxindex < brominepair2index
    m2index = maxindex;
    m2 = mw(maxindex);
else
    m2index = brominepair2index;
    m2 = mw(brominepair2index);
end

%Decoding m1, r1, r2

%Finding all possible m1's with greater than specified % of maxindex intensity (starts at
percentage above, decreases 1% if no possibilities, .1% if already 1% or lower, stops at
0.1%, if more than two solutions, increases by 1% until 99% of max intensity is reached

%Done = 2 means r1,r2,m1,m2 pair and r3,m3 found, doner(1) means r1,m1,r1,m2 found
while done ~= 2
    done = 0;
    if doner(1) == false
        mlindex = 0;
    %Redefining variables to zero for new percentage
    m1 = 0;
    mlposs = 0;
    mlclose = 0;
    mlonlylposs = 0;
    r1close = 0;
    rlonlylposs = 0;
    r2poss = 0;
    r2close = 0;
    r2onlylposs = 0;
    r1final = 0;
    m1final = 0;

    %m1 start indicates index at which an r1 could be possible so scanning is practical
    for index = m1start:maxindex-200
        if intensity(index) >= (intensitycutoffindexr1 * intensity(maxindex))
            %checking if bromine pair, and making new index, bromineindex for all
            over specified %
            bromineindex = index;
            %cycling through increasing indices less than 2 mw above, to see if any
            are of high enough intensity to be a bromine pair
            while (mw(bromineindex)- mw(index)) <= (2 + brominecutoff)
                bromineindex = bromineindex + 1;
                if 2 <= abs(mw(bromineindex) - mw(index)) & abs(mw(bromineindex) -
                mw(index)) <= 2 + brominecutoff
                    if intensity(bromineindex) >= (intensitycutoffbromine *
                    intensity(index))
                        mlposs = mlposs + 1 ;
                        mlindex(mlposs) = bromineindex;
                        m1(mlposs) = mw(index);
                    end
                end
            end
        end
    end
end

%Compare m1 possibilities to library of r1 MW's
% m is counter for number of r1 matches
m = 0;
for n = 1:size(mlindex,2)
    %convert to r1poss
    if ml(n) ~= 0
        r1poss(n) = m1(n) - 753;
        for index = 1:size(r1,2)

```

```

        %if r1poss and r1 from library are within rcutoff of eachother, then
create a close vector for m1
        if abs( r1poss(n) - r1(index) ) <= rcutoff
            m=m+1;
            r1close(m) = r1(index);
            m1close(m) = r1(index) +753;
        end
    end
end

%Set duplicate entries to zero
for n = size(r1close,2):-1:1
    for m = size(r1close,2):-1:1
        if r1close(n) == r1close(m)
            if n~=m
                r1close(n) = 0;
            end
        end
    end
end

%Copy non-zero entries to another array
m=0;
for n = size(r1close,2):-1:1
    if r1close(n) ~= 0;
        m=m+1;
        r1onlylposs(m) = r1close(n);
    end
end

%Set duplicate entries to zero
for n = size(m1close,2):-1:1
    for m = size(m1close,2):-1:1
        if m1close(n) == m1close(m)
            if n~=m
                m1close(n) = 0;
            end
        end
    end
end

%Copy non-zero entries to another array
m=0;
for n = size(m1close,2):-1:1
    if m1close(n) ~= 0;
        m=m+1;
        m1onlylposs(m) = m1close(n);
    end
end

%m is counter for number of r2 matches
m = 0;
%r2found is false until a match is found for one of the r1onlylposs
%(that name is arbitrary, could be any number of possibilities) for
%any index, if it stays false, then that entry is not translated to
%an r value and then the m value is not also translated to next
%array
r2found = false;
for n = 1:size(r1onlylposs,2)
    %convert to r1poss
    if r1onlylposs(n)~=0
        r2poss(n) = m2 - r1onlylposs(n) - 810;
        for index = 1:size(r2,2)
            %if r2poss and r2 from library are within rcutoff of eachother,
            %then create a match vector for m2
            if abs( r2poss(n) - r2(index) ) <= rcutoff
                m=m+1;
            end
        end
    end
end

```

```

        r2close(m) = r2(index);
        r2found = true;
    end
end
end
%to delete r1's that do not result in available r2's
%if r2matches is less than r1's run through, last r1 must not
%have matched, so delete it and its corresponding m1
    if r2found == false
        r1onlylposs(n) = 0;
        m1onlylposs(n) = 0;
    end
    r2found = false;
end
end

%Set duplicate entries to zero
for n = size(r2close,2):-1:1
    for m = size(r2close,2):-1:1
        if r2close(n) == r2close(m)
            if n~=m
                r2close(n) = 0;
            end
        end
    end
end
end

%Copy non-zero entries to another array
m=0;
for n = size(r2close,2):-1:1
    if r2close(n) ~= 0;
        m=m+1;
        r2onlylposs(m) = r2close(n);
    end
end
end

%Set duplicate entries to zero
for n = size(r1onlylposs,2):-1:1
    for m = size(r1onlylposs,2):-1:1
        if r1onlylposs(n) == r1onlylposs(m)
            if n~=m
                r1onlylposs(n) = 0;
            end
        end
    end
end
end

%Copy non-zero entries to another array
m=0;
for n = size(r1onlylposs,2):-1:1
    if r1onlylposs(n) ~= 0;
        m=m+1;
        r1final(m) = r1onlylposs(n);
    end
end
end

%Set duplicate entries to zero
for n = size(m1onlylposs,2):-1:1
    for m = size(m1onlylposs,2):-1:1
        if m1onlylposs(n) == m1onlylposs(m)
            if n~=m
                m1onlylposs(n) = 0;
            end
        end
    end
end
end

%Copy non-zero entries to another array
m=0;
for n = size(m1onlylposs,2):-1:1
    if m1onlylposs(n) ~= 0;
        m=m+1;

```

```

        mlfinal(m) = mlonlylposs(n);
    end
end

doner(1) = true;

%check if more than 2 possibilites for r2,m2, if so there must also be for r1,m1
if size(r2onlylposs,2) >2
    %check that last time some entries were found, if no will display the >2
    entries instead of going down again and up into an infinite loop
    if prevr2onlylposs ~= 0
        doner(1) = false;
        %increase % if too many possibilities found
        if intensitycutoffindexr1 <1
            intensitycutoffindexr1 = intensitycutoffindexr1 + .01;
        else
            %if cannot increase % any more, tell user
            doner(1) = true;
            disp('r2 cannot be found')
        end
    end
end

%check if 0 possibilites for r2,m2, if so there must not be enough
%possibilites for r1,m1
if size(r2onlylposs,2) == 1 & r2onlylposs(1) == 0
    if size(prevr2onlylposs,2) > 2
        r2onlylposs = prevr2onlylposs;
        r1final = prevr1final
        mlfinal = prevmlfinal
    else
        doner(1) = false;
        %decrease % if no possibilities found
        if intensitycutoffindexr1 >.011
            intensitycutoffindexr1 = intensitycutoffindexr1 - .01;
        else
            %decrease % by a smaller amount if no possibilities found
            if intensitycutoffindexr1 >.0011
                intensitycutoffindexr1 = intensitycutoffindexr1 - .001;
            else
                %if cannot decrease % any more, tell user
                doner(1) = true;
                disp('r2 cannot be found')
            end
        end
    end
end
end
end

%Decoding m3
%Using the same mechanism as previously, except r3 does not depend on the value
%of r1 or r2, so no matches need be excluded as was done above
if doner(2) == false

m3index = 0;
m3 = 0;
m3poss = 0;
m3close = 0;
m3onlylposs = 0;
r3close = 0;
r3onlylposs = 0;

for index = maxindex+500:size(intensity)-300
    if intensity(index) >= (intensitycutoffindexr3 * intensity(maxindex))
        %checking if bromine pair, and making new index, bromine index for
        %all over specified %
        bromineindex = index;
        while (mw(bromineindex)- mw(index)) <= (2 + brominecutoff)
            bromineindex = bromineindex + 1;
            if 2 <= abs(mw(bromineindex) - mw(index)) & abs(mw(bromineindex) -
mw(index)) <= 2 + brominecutoff

```

```

                                if intensity(bromineindex) >= (intensitycutoffbromine *
intensity(index))
                                    m3poss = m3poss + 1 ;
                                    m3index(m3poss) = bromineindex;
                                    m3(m3poss) = mw(index);
                                end
                            end
                        end
                    end
                end
            end

%Compare m3poss to library of r3 MW's
%set cutoff for how close calculated and actual r mw's can be
%m is counter for number of r3 matches
m = 0;
for n = 1:size(m3,2)
    %convert to r3poss if not zero
    if m3(n) ~= 0
        r3poss(n) = m3(n) - m2 - 42;
        for index = 1:size(r3,2)
            %if r3poss and r3 from library are within rcutoff of eachother,
            %then create a match vector for m3
            if abs( r3poss(n) - r3(index) ) <= rcutoff
                m=m+1;
                r3close(m) = r3(index);
                m3close(m) = r3(index) + m2 + 42;
            end
        end
    end
end
%Set duplicate entries to zero
for n = size(r3close,2):-1:1
    for m = size(r3close,2):-1:1
        if r3close(n) == r3close(m)
            if n~=m
                r3close(n) = 0;
            end
        end
    end
end
%Copy non-zero entries to another array
m=0;
for n = size(r3close,2):-1:1
    if r3close(n) ~= 0;
        m=m+1;
        r3only1poss(m) = r3close(n);
    end
end
%Set duplicate entries to zero
for n = size(m3close,2):-1:1
    for m = size(m3close,2):-1:1
        if m3close(n) == m3close(m)
            if n~=m
                m3close(n) = 0;
            end
        end
    end
end
%Copy non-zero entries to another array
m=0;
for n = size(m3close,2):-1:1
    if m3close(n) ~= 0;
        m=m+1;
        m3only1poss(m) = m3close(n);
    end
end
end

doner(2) = true;

%check if more than 2 possibilites for r3,m3

```

```

    if size(r3onlylposs,2) > 2
        %check that last time some entries were found, if no will display the >2
        entries instead of going down again and up into an infinite loop
        if prevr3onlylposs ~= 0
            doner(2) = false;
            %increase % if too many possibilities found
            if intensitycutoffindexr3 <1
                intensitycutoffindexr3 = intensitycutoffindexr3 + .01;
            else
                %if cannot increase % any more, tell user
                doner(2) = true;
                disp('r3 cannot be found')
            end
        end
    end
    %check if 0 possibilites for r3,m3
    if size(r3onlylposs,2) == 1 & r3onlylposs(1) == 0
        %check that last time some entries were found, if so will displayprevious
        possibilities
        if size(prevr3onlylposs,2) > 2
            r3onlylposs = prevr3onlylposs;
            m3onlylposs = prevm3onlylposs;
        else
            doner(2) = false;
            %decrease % if no possibilities found
            if intensitycutoffindexr3 >.011
                intensitycutoffindexr3 = intensitycutoffindexr3 - .01;
            else
                %decrease % by a smaller amount if no possibilities found
                if intensitycutoffindexr3 >.0011
                    intensitycutoffindexr3 = intensitycutoffindexr3 - .001;
                else
                    %if cannot decrease % any more, tell user
                    doner(2) = true;
                    disp('r3 cannot be found')
                end
            end
        end
    end
end
end
end

%Check that both r1,m1,r2,m2 and r3,m3 found, if so then done will = 2 and overall while
loop to change sensitivity will be exited
for n = 1:2
    if doner(n) == true
        done = done + 1;
    end
end

%Saving r1, m1, r2, m2, r3, m3 for next previous entry
prevr1final= r1final;
prevm1final = m1final;
prevr2onlylposs = r2onlylposs;
prevr3onlylposs = r3onlylposs;
prevm3onlylposs = m3onlylposs;

%to end while loop
end

%disp ('intensitycutoffindexr1')
%disp (intensitycutoffindexr1)
%disp ('intensitycutoffindexr3')
%disp (intensitycutoffindexr3)

%Display all final values for r1, m1, r2, m2, r3, m3, should only display
%1 or 2 values for each unless 0 to >2 encountered by 1% change, then 3 or
%more values could be displayed. There should be only 1 value for m2

disp('This is the possible m1')
disp(m1final)
disp('This is the possible r1')

```

```
disp(r1final)
disp('This is the possible m2')
disp(m2)
disp('This is the possible r2')
disp(r2onlylposs)
disp('This is the possible m3')
disp(m3onlylposs)
disp('This is the possible r3')
disp(r3onlylposs)

%Displaying not that m2 not in the correct range (calculated from r1, r2 lists)
if note == true
    disp('NOTE: MAXIMUM PEAK IS NOT WITHING M2 RANGE ((min(r1) + min(r2) +800) to (max(r1)
+ max(r2) +820)!')
end

%Clearing all data used in program, necessary to not have extraneous data in the following
run of program with different dataset
Clear
```

## Legend of Supplementary Tables, Scheme and Figures

**Table S1.** List of XBW-SM3 R<sub>1</sub> building blocks, the occurrence of each building block in 91 identified compounds and their molecular weight. R<sub>1</sub> building blocks were all amines.

**Table S2.** List of XBW-SM3 R<sub>2</sub> building blocks, the occurrence of each building block in 91 identified compounds and their molecular weight. R<sub>2</sub> building blocks were all aldehydes.

**Table S3.** List of XBW-SM3 R<sub>3</sub> building block, the occurrence of each building block in 91 identified compounds and their molecular weight. R<sub>3</sub> building blocks included amino acids, carboxylic acids and isocyanates. Molecular weight (MW) is adjusted due to losing a water [-H<sub>2</sub>O, -18]\* molecule and/or gaining a proton [+H<sup>+</sup>, +1]<sup>#</sup> during reactions and MS analysis.

**Table S4.** List of 91 small molecules that bound to the phage display proteomes

**Table S5.** Result of biopanning over 55 small molecules. NA means peptide sequences are not available due to the failure of DNA sequencing, the failure of translation of DNA to putative peptide sequences or the peptide sequences did not match any sequences in the database after the BLAST search

**Scheme S1.** The synthesis of OBOC small molecule library, XBW-SM3. The small molecule was synthesized on the surface of the TantaGel resin while its corresponding coding tag ladders were synthesized in the inner topological segregated multi-layers.

**Figure S1.** The illustration of the small molecule decoding. The molecular weights of the three coding tags M<sub>1</sub>, M<sub>2</sub>, and M<sub>3</sub> were identified and indicated with arrows. The molecular weights of the three building blocks R<sub>1</sub>, R<sub>2</sub> and R<sub>3</sub> were then calculated. Referring to **Supplementary Table S1, 2, and 3**, each building block was identified. R<sub>1</sub>=M<sub>1</sub>-753=990-753=156=1-(3-aminopropyl)-2-pipecoline, R<sub>2</sub>=M<sub>2</sub>-M<sub>1</sub>-57=174=α,α,α-trifluoro-*m*-tolualdehyde, R<sub>3</sub>=M<sub>3</sub>-M<sub>2</sub>-42=193 which didn't match any MW on Supplementary Table S3; however, 193-1=192 matched the MW of 4-butoxyphenyl isocyanate. Therefore, R<sub>3</sub> was confirmed 4-butoxyphenyl isocyanate

### Figure S2.

LWW31 inhibited the expression of luciferase in Promega TnT coupled reticulocyte lysate cell-free protein expression system



**Supplementary Tables**

Table S1.

| Name                             | Occurrence in 91 identified compounds | MW     |
|----------------------------------|---------------------------------------|--------|
| Propargylamine                   | 0                                     | 55.08  |
| propylamine                      | 1                                     | 59.11  |
| cyclobutylamine                  | 3                                     | 71.12  |
| isobutylamine                    | 3                                     | 73.14  |
| 2-methoxyethylamine              | 0                                     | 75.11  |
| 1-ethylpropylamine               | 2                                     | 87.17  |
| beta-alanine t-butyl ester HCl   | 5                                     | 89     |
| tetrahydrofurfurylamine          | 0                                     | 101.15 |
| benzylamine                      | 2                                     | 107.16 |
| 2-(aminomethyl)pyridine          | 6                                     | 108.14 |
| 1-Boc-4-(aminomethyl)piperidine  | 8                                     | 114    |
| 1-(2-aminoethyl)pyrrolidine      | 0                                     | 114.19 |
| (R)-1-cyclohexylethylamine       | 1                                     | 127.3  |
| 1-(2-aminoethyl)piperidine       | 4                                     | 128.22 |
| 4-(2-aminoethyl)morpholine       | 5                                     | 130.19 |
| 3-butoxypropylamine              | 3                                     | 131.22 |
| 4-fluorophenylethylamine         | 1                                     | 139.17 |
| 1-(3-aminopropyl)-2-pyrrolidione | 6                                     | 142.2  |
| 2,5-difluorobenzylamine          | 4                                     | 143.14 |
| piperonylamine                   | 0                                     | 151.17 |
| 1-(3-aminopropyl)-2-pipecoline   | 22                                    | 156.27 |
| histamine(Boc)                   | 1                                     | 162    |
| 1-(1-naphthyl)ethylamine         | 3                                     | 171.24 |
| 4-amino-1-benzylpiperidine       | 11                                    | 190.29 |

Table S2.

| Name                                             | Occurrence in 91 identified compounds | MW     |
|--------------------------------------------------|---------------------------------------|--------|
| 4-pyridine carboxaldehyde                        | 13                                    | 107.11 |
| m-tolualdehyde                                   | 5                                     | 120.15 |
| 4-hydroxybenzaldehyde                            | 13                                    | 122.12 |
| 3-fluorobenzaldehyde                             | 8                                     | 124.11 |
| 2,5-dimethylbenzaldehyde                         | 4                                     | 134.18 |
| 2,5-difluorobenzaldehyde                         | 1                                     | 142.11 |
| 4-(dimethylamino)benzaldehyde                    | 1                                     | 149.19 |
| 4-carboxyl benzaldehyde                          | 1                                     | 150.13 |
| 2-Quinoline-carboxaldehyde                       | 10                                    | 157.17 |
| 2,4-dimethoxybenzaldehyde                        | 3                                     | 166.18 |
| $\alpha,\alpha,\alpha$ -trifluoro-m-tolualdehyde | 2                                     | 174.12 |
| 4-Hydroxy-3-methoxycinnamaldehyde                | 0                                     | 178.19 |
| 3-ethoxy-4-methoxybenzaldehyde                   | 3                                     | 180.21 |
| 2,6-Dimethoxy-4-hydroxybenzaldehyde              | 0                                     | 182.18 |
| 4-methoxy-1-naphthaldehyde                       | 2                                     | 186.21 |
| 2-Fluorene-carboxaldehyde                        | 5                                     | 194.23 |
| Pentafluoro-benzaldehyde                         | 0                                     | 196.07 |
| 3-phenoxybenzaldehyde                            | 8                                     | 198.22 |
| 9-Anthraldehyde                                  | 8                                     | 206.24 |
| 3-(4-methylphenoxy)benzaldehyde                  | 0                                     | 212.25 |
| 3-(4-tert-butylphenoxy)benzaldehyde              | 3                                     | 254.33 |
| 3-(3-(trifluoromethyl)phenoxy)benzaldehyde       | 1                                     | 266.22 |

Table S3.

| Name                                                 | Occurrence in 91 identified compounds | MW (adjusted)     |
|------------------------------------------------------|---------------------------------------|-------------------|
| Glycine                                              | 1                                     | 58 <sup>+#</sup>  |
| 2-butynoic acid                                      | 2                                     | 67 <sup>+#</sup>  |
| Cyclopropane carboxyl acid                           | 6                                     | 69 <sup>+#</sup>  |
| Alanine                                              | 4                                     | 72 <sup>+#</sup>  |
| Propyl isocyanate                                    | 3                                     | 86 <sup>#</sup>   |
| Proline                                              | 6                                     | 98 <sup>+#</sup>  |
| Tert-butyl isocyanate                                | 5                                     | 100 <sup>#</sup>  |
| Threonine                                            | 2                                     | 102 <sup>+#</sup> |
| Benzoic acid                                         | 1                                     | 105 <sup>+#</sup> |
| 1-methyl-2-pyrrole-carboxylic acid                   | 0                                     | 108 <sup>+#</sup> |
| Cyclopentyl isocyanate                               | 4                                     | 112 <sup>#</sup>  |
| Aspartic acid                                        | 3                                     | 116 <sup>+#</sup> |
| Phenyl isocyanate                                    | 1                                     | 120 <sup>#</sup>  |
| 4-fluorobenzoic acid                                 | 3                                     | 123 <sup>+#</sup> |
| Cyclohexyl isocyanate                                | 2                                     | 126 <sup>#</sup>  |
| Glutamic acid                                        | 3                                     | 130 <sup>+#</sup> |
| o-tolyl isocyanate                                   | 3                                     | 134 <sup>#</sup>  |
| Histidine                                            | 1                                     | 138 <sup>+#</sup> |
| 3,4-difluorobenzoic acid                             | 2                                     | 141 <sup>+#</sup> |
| 2-methoxyphenyl isocyanate                           | 2                                     | 150 <sup>#</sup>  |
| Arginine                                             | 3                                     | 157 <sup>+#</sup> |
| Tyrosine                                             | 2                                     | 164 <sup>+#</sup> |
| 1-naphthyl isocyanate                                | 3                                     | 170 <sup>#</sup>  |
| 2-tert-butylphenyl isocyanate                        | 0                                     | 176 <sup>#</sup>  |
| 3,5-dimethoxyphenyl isocyanate                       | 1                                     | 180 <sup>#</sup>  |
| (2-naphthoxy)acetic acid                             | 7                                     | 185 <sup>+#</sup> |
| $\alpha,\alpha,\alpha$ -trifluoro-m-tolyl isocyanate | 3                                     | 188 <sup>#</sup>  |
| 4-butoxyphenyl isocyanate                            | 0                                     | 192 <sup>#</sup>  |
| 2-biphenyl isocyanate                                | 3                                     | 196 <sup>#</sup>  |
| 3-benzoyl-2-pyridinecarboxylic acid                  | 13                                    | 210 <sup>+#</sup> |
| 2-phenyl-4-quinolinecarboxylic acid                  | 1                                     | 232 <sup>+#</sup> |
| SM                                                   | 1                                     | 267 <sup>+#</sup> |

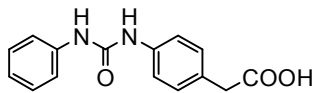

Table S4

| Compound | R <sub>1</sub> Name               | R <sub>2</sub> Name                              | R <sub>3</sub> Name                                  |
|----------|-----------------------------------|--------------------------------------------------|------------------------------------------------------|
| LWW1     | 1-Boc-4-(aminomethyl)piperidine   | 2-quinoline-carboxyaldehyde                      | 3-benzoyl-2-pyridinecarboxylic acid                  |
| LWW2     | 1-Boc-4-(aminomethyl)piperidine   | 2-quinoline-carboxyaldehyde                      | Arg                                                  |
| LWW3     | 1-Boc-4-(aminomethyl)piperidine   | 2-quinoline-carboxyaldehyde                      | Tert-butyl isocyanate                                |
| LWW4     | 1-(3-aminopropyl)-2-pyrrolidinone | 3-ethoxy-4-methoxybenzaldehyde                   | Cyclopropane carboxylic acid                         |
| LWW5     | 1-(3-aminopropyl)-2-pipecoline    | 2-quinoline-carboxyaldehyde                      | (2-naphthoxy)acetic acid                             |
| LWW6     | 1-Boc-4-(aminomethyl)piperidine   | 2-quinoline-carboxyaldehyde                      | Tert-butyl isocyanate                                |
| LWW7     | 1-(3-aminopropyl)-2-pipecoline    | 2-quinoline-carboxyaldehyde                      | (2-naphthoxy)acetic acid                             |
| LWW8     | 1-Boc-4-(aminomethyl)piperidine   | 4-pyridine carboaldehyde                         | 2-biphenyl isocyanate                                |
| LWW9     | 4-(2-aminoethyl)morpholine        | 4-hydroxybenzaldehyde                            | 3-benzoyl-2-pyridinecarboxylic acid                  |
| LWW10    | 3-butoxypropylamine               | 4-hydroxybenzaldehyde                            | 3-benzoyl-2-pyridinecarboxylic acid                  |
| LWW11    | 4-fluorophenylethylamine          | 3-fluorobenzaldehyde                             | Pro                                                  |
| LWW12    | histamine(Boc)                    | 3-phenoxybenzaldehyde                            | Propyl isocyanate                                    |
| LWW13    | 1-(2-aminoethyl)piperidine        | 4-hydroxybenzaldehyde                            | Cyclohexyl isocyanate                                |
| LWW14    | 1-(2-aminoethyl)piperidine        | 4-hydroxybenzaldehyde                            | 4-fluorobenzoic acid                                 |
| LWW15    | 1-(3-aminopropyl)-2-pipecoline    | 4-pyridine carboaldehyde                         | $\alpha,\alpha,\alpha$ -trifluoro-m-tolyl isocyanate |
| LWW16    | 1-(3-aminopropyl)-2-pipecoline    | 4-pyridine carboaldehyde                         | (2-naphthoxy)acetic acid                             |
| LWW17    | 4-(2-aminoethyl)morpholine        | 9-anthraldehyde                                  | Asp                                                  |
| LWW18    | 4-(2-aminoethyl)morpholine        | 9-anthraldehyde                                  | Pro                                                  |
| LWW19    | 1-(3-aminopropyl)-2-pyrrolidinone | 3-fluorobenzaldehyde                             | Tert-butyl isocyanate                                |
| LWW20    | 2,5-difluorobenzylamine           | 3-fluorobenzaldehyde                             | Tert-butyl isocyanate                                |
| LWW21    | beta-alanine t-butyl ester HCl    | 4-pyridine carboaldehyde                         | Glu                                                  |
| LWW22    | 1-(3-aminopropyl)-2-pipecoline    | $\alpha,\alpha,\alpha$ -trifluoro-m-tolualdehyde | SM (Ask Ruiwu)                                       |
| LWW23    | beta-alanine t-butyl ester HCl    | 4-hydroxybenzaldehyde                            | Cyclopropane carboxylic acid                         |
| LWW24    | beta-alanine t-butyl ester HCl    | 4-hydroxybenzaldehyde                            | 2-butynoic acid                                      |
| LWW25    | 1-(3-aminopropyl)-2-pipecoline    | 2,5-dimethylbenzaldehyde                         | 1-naphthyl isocyanate                                |
| LWW26    | 1-(3-aminopropyl)-2-pipecoline    | 2,4-dimethoxybenzaldehyde                        | $\alpha,\alpha,\alpha$ -trifluoro-m-tolyl isocyanate |
| LWW27    | 1-(3-aminopropyl)-2-pipecoline    | 2,4-dimethoxybenzaldehyde                        | (2-naphthoxy)acetic acid                             |
| LWW28    | 1-(naphthyl)ethylamine            | 4-hydroxybenzaldehyde                            | Arg                                                  |
| LWW29    | 4-amino-1-benzylpiperidine        | 3-phenoxybenzaldehyde                            | (2-naphthoxy)acetic acid                             |
| LWW30    | 2-(aminomethyl)pyridine           | $\alpha,\alpha,\alpha$ -trifluoro-m-tolualdehyde | o-tolyl isocyanate                                   |
| LWW31    | 1-(naphthyl)ethylamine            | 3-phenoxybenzaldehyde                            | Propyl isocyanate                                    |
| LWW32    | (R)-1-cyclohexylethylamine        | 2,5-dimethylbenzaldehyde                         | o-tolyl isocyanate                                   |
| LWW33    | isobutylamine                     | m-tolualdehyde                                   | 3-benzoyl-2-pyridinecarboxylic acid                  |
| LWW34    | 1-(3-aminopropyl)-2-pyrrolidinone | 2-fluorene-carboxaldehyde                        | Ala                                                  |
| LWW35    | 2,5-difluorobenzylamine           | 2-fluorene-carboxaldehyde                        | Ala                                                  |
| LWW36    | 1-(3-aminopropyl)-2-pyrrolidinone | 2-quinoline-carboxyaldehyde                      | 3-benzoyl-2-pyridinecarboxylic acid                  |
| LWW37    | Propylamine                       | 4-pyridine carboaldehyde                         | Arg                                                  |
| LWW38    | 4-amino-1-benzylpiperidine        | 9-anthraldehyde                                  | 1-naphthyl isocyanate                                |
| LWW39    | 4-amino-1-benzylpiperidine        | 9-anthraldehyde                                  | 2-methoxyphenyl isocyanate                           |
| LWW40    | 2-(aminomethyl)pyridine           | 3-fluorobenzaldehyde                             | Benzoic acid                                         |
| LWW41    | 1-(3-aminopropyl)-2-pipecoline    | 3-(4-tert-butylphenoxy)benzaldehyde              | (2-naphthoxy)acetic acid                             |
| LWW42    | 1-(3-aminopropyl)-2-pipecoline    | 3-(4-tert-butylphenoxy)benzaldehyde              | 2-methoxyphenyl isocyanate                           |
| LWW43    | 1-(3-aminopropyl)-2-pipecoline    | 3-(4-tert-butylphenoxy)benzaldehyde              | 4-fluorobenzoic acid                                 |
| LWW44    | 1-(3-aminopropyl)-2-pipecoline    | 4-carboxylbenzaldehyde                           | Thr                                                  |
| LWW45    | 1-(3-aminopropyl)-2-pipecoline    | 4-(dimethylamine)benzaldehyde                    | Thr                                                  |
| LWW46    | 1-Boc-4-(aminomethyl)piperidine   | 9-anthraldehyde                                  | Cyclopentyl isocyanate                               |
| LWW47    | 1-(naphthyl)ethylamine            | 2,4-dimethoxybenzaldehyde                        | Tyr                                                  |
| LWW48    | beta-alanine t-butyl ester HCl    | 4-hydroxybenzaldehyde                            | 3-benzoyl-2-pyridinecarboxylic acid                  |
| LWW49    | 4-amino-1-benzylpiperidine        | 3-phenoxybenzaldehyde                            | Cyclohexyl isocyanate                                |
| LWW50    | 4-amino-1-benzylpiperidine        | 3-phenoxybenzaldehyde                            | 4-fluorobenzoic acid                                 |
| LWW51    | 2-(aminomethyl)pyridine           | 3-phenoxybenzaldehyde                            | o-tolyl isocyanate                                   |
| LWW52    | 1-(3-aminopropyl)-2-pipecoline    | 4-pyridine carboaldehyde                         | $\alpha,\alpha,\alpha$ -trifluoro-m-tolyl isocyanate |
| LWW53    | 1-(3-aminopropyl)-2-pipecoline    | 4-pyridine carboaldehyde                         | (2-naphthoxy)acetic acid                             |
| LWW54    | isobutylamine                     | 4-pyridine carboaldehyde                         | Pro                                                  |
| LWW55    | 4-amino-1-benzylpiperidine        | 2-quinoline-carboxyaldehyde                      | 2-biphenyl isocyanate                                |
| LWW56    | 1-(3-aminopropyl)-2-pyrrolidinone | 4-pyridine carboaldehyde                         | Pro                                                  |
| LWW57    | 2,5-difluorobenzylamine           | 4-pyridine carboaldehyde                         | Pro                                                  |
| LWW58    | 1-(3-aminopropyl)-2-pipecoline    | 2,5-dimethylbenzaldehyde                         | 3-benzoyl-2-pyridinecarboxylic acid                  |
| LWW59    | 1-(3-aminopropyl)-2-pipecoline    | 2,5-dimethylbenzaldehyde                         | 3,5-dimethoxyphenyl isocyanate                       |
| LWW60    | benzylamine                       | 4-hydroxybenzaldehyde                            | 3-benzoyl-2-pyridinecarboxylic acid                  |
| LWW61    | 2-(aminomethyl)pyridine           | 4-hydroxybenzaldehyde                            | 3-benzoyl-2-pyridinecarboxylic acid                  |
| LWW62    | 4-amino-1-benzylpiperidine        | 3-ethoxy-4-methoxybenzaldehyde                   | Phenyl isocyanate                                    |
| LWW63    | 4-amino-1-benzylpiperidine        | 3-ethoxy-4-methoxybenzaldehyde                   | Ala                                                  |
| LWW64    | 1-(3-aminopropyl)-2-pipecoline    | 3-[3-(trifluoromethyl)phenoxy]benzaldehyde       | Asp                                                  |
| LWW65    | 3-butoxypropylamine               | 4-methoxy-1-naphthaldehyde                       | 3-benzoyl-2-pyridinecarboxylic acid                  |
| LWW66    | 3-butoxypropylamine               | 4-methoxy-1-naphthaldehyde                       | 2-butynoic acid                                      |
| LWW67    | 1-(3-aminopropyl)-2-pipecoline    | 4-hydroxybenzaldehyde                            | 3-benzoyl-2-pyridinecarboxylic acid                  |
| LWW68    | 1-(3-aminopropyl)-2-pipecoline    | 4-hydroxybenzaldehyde                            | Pro                                                  |
| LWW69    | beta-alanine t-butyl ester HCl    | 2-fluorene-carboxaldehyde                        | Tyr                                                  |
| LWW70    | 1-Boc-4-(aminomethyl)piperidine   | 3-fluorobenzaldehyde                             | His                                                  |
| LWW71    | cyclobutylamine                   | 9-anthraldehyde                                  | 2-phenyl-4-quinolinecarboxylic acid                  |
| LWW72    | cyclobutylamine                   | 9-anthraldehyde                                  | 3-benzoyl-2-pyridinecarboxylic acid                  |

|       |                                   |                             |                                     |
|-------|-----------------------------------|-----------------------------|-------------------------------------|
| LWW73 | cyclobutylamine                   | 9-anthraldehyde             | Gly                                 |
| LWW74 | 2-(aminomethyl)pyridine           | 2,5-difluorobenzaldehyde    | Tert-butyl isocyanate               |
| LWW75 | 1-ethylpropylamine                | m-tolualdehyde              | 3-benzoyl-2-pyridinecarboxylic acid |
| LWW76 | 1-ethylpropylamine                | m-tolualdehyde              | 3,4-difluorobenzoic acid            |
| LWW77 | 1-(3-aminopropyl)-2-pyrrolidinone | 3-phenoxybenzaldehyde       | Glu                                 |
| LWW78 | 2,5-difluorobenzylamine           | 3-phenoxybenzaldehyde       | Glu                                 |
| LWW79 | benzylamine                       | 4-pyridine carboaldehyde    | 3,4-difluorobenzoic acid            |
| LWW80 | isobutylamine                     | m-tolualdehyde              | Cyclopropane carboxylic acid        |
| LWW81 | 1-(2-aminoethyl)piperidine        | 4-pyridine carboaldehyde    | Asp                                 |
| LWW82 | 1-(2-aminoethyl)piperidine        | 4-pyridine carboaldehyde    | Cyclopropane carboxylic acid        |
| LWW83 | 4-amino-1-benzylpiperidine        | 3-fluorobenzaldehyde        | 2-biphenyl isocyanate               |
| LWW84 | 4-amino-1-benzylpiperidine        | 3-fluorobenzaldehyde        | 1-naphthyl isocyanate               |
| LWW85 | 4-amino-1-benzylpiperidine        | 3-fluorobenzaldehyde        | Cyclopentyl isocyanate              |
| LWW86 | 2-(aminomethyl)pyridine           | 2-quinoline-carboxyaldehyde | Cyclopropane carboxylic acid        |
| LWW87 | 1-(3-aminopropyl)-2-pipecoline    | m-tolualdehyde              | Cyclopentyl isocyanate              |
| LWW88 | 1-(3-aminopropyl)-2-pipecoline    | 2-quinoline-carboxyaldehyde | Cyclopentyl isocyanate              |
| LWW89 | 4-(2-aminoethyl)morpholine        | 2-fluorene-carboxaldehyde   | Ala                                 |
| LWW90 | 4-(2-aminoethyl)morpholine        | 2-fluorene-carboxaldehyde   | Cyclopropane carboxylic acid        |
| LWW91 | 1-Boc-4-(aminomethyl)piperidine   | 4-hydroxybenzaldehyde       | Propyl isocyanate                   |

Table S5.

| Compound ID | Number of Clones sequenced | Bound Putative Protein ID                                                                                                                                |
|-------------|----------------------------|----------------------------------------------------------------------------------------------------------------------------------------------------------|
| LWW1        | 4 out of 5                 | Homo sapiens WW domain binding protein 5 (WBP5), transcript variant                                                                                      |
|             | 1 out of 5                 | NA                                                                                                                                                       |
| LWW2        | 5 out of 5                 | Homo sapiens ribosomal protein L4 (RPL4), mRNA                                                                                                           |
| LWW4        | 3 out of 5                 | Homo sapiens signal recognition particle 19kDa (SRP19)                                                                                                   |
|             | 1 out of 5                 | receptor-interacting factor 1                                                                                                                            |
|             | 1 out of 5                 | NA                                                                                                                                                       |
| LWW5        | 5 out of 5                 | NA                                                                                                                                                       |
| LWW7        | 5 out of 10                | Porimin precursor (Transmembrane protein 123) (Pro-oncosis receptor inducing membrane injury) (Keratinocytes-associated transmembrane protein 3) (KCT-3) |
|             | 4 out of 10                | Zinc finger motifs                                                                                                                                       |
|             | 1 out of 10                | NA                                                                                                                                                       |
| LWW8        | 5 out of 5                 | DNA topoisomerase II, alpha isozyme                                                                                                                      |
| LWW9        | 3 out of 5                 | Homo sapiens BCL2/adenovirus E1B 19kDa interacting protein 3 (BNIP3), nuclear gene encoding mitochondrial protein, mRNA                                  |
|             | 2 out of 5                 | Homo sapiens albumin (ALB), mRNA                                                                                                                         |
| LWW10       | 2 out of 5                 | Homo sapiens pericentriolar material 1 (PCM1), mRNA                                                                                                      |
|             | 3 out of 5                 | Homo sapiens DEAD (Asp-Glu-Ala-Asp) box polypeptide 21 (DDX21)                                                                                           |
| LWW11       | 1 out of 5                 | albumin, isoform CRA_1                                                                                                                                   |
|             | 4 out of 5                 | NA                                                                                                                                                       |
| LWW12       | 5 out of 5                 | Homo sapiens family with sequence similarity 44, member A (FAM44A)                                                                                       |
| LWW13       | 5 out of 5                 | Homo sapiens retinoblastoma binding protein 6 (RBBP6), transcript                                                                                        |
| LWW15       | 2 out of 5                 | Homo sapiens muscleblind-like 2 (Drosophila) (MBNL2), transcript variant 1, mRNA                                                                         |
|             | 3 out of 5                 | NA                                                                                                                                                       |
| LWW16       | 4 out of 5                 | Homo sapiens nucleolar and coiled-body phosphoprotein 1 (NOLC1), mRNA                                                                                    |
|             | 1 out of 5                 | Homo sapiens actinin, alpha 4 (ACTN4), mRNA                                                                                                              |
| LWW17       | 5 out of 5                 | NA                                                                                                                                                       |
| LWW18       | 1 out of 5                 | Homo sapiens beta-2-microglobulin (B2M), mRNA                                                                                                            |
|             | 1 out of 5                 | Homo sapiens albumin (ALB), mRNA                                                                                                                         |
|             | 3 out of 5                 | NA                                                                                                                                                       |
| LWW19       | 1 out of 5                 | Putative p150                                                                                                                                            |
|             | 4 out of 5                 | NA                                                                                                                                                       |
| LWW20       | 4 out of 10                | Homo sapiens retinoblastoma binding protein 6 (RBBP6), transcript variant 2, mRNA                                                                        |
|             | 6 out of 10                | NA                                                                                                                                                       |
| LWW21       | 2 out of 5                 | Homo sapiens nuclear casein kinase and cyclin-dependent kinase substrate 1 (NUCKS1)                                                                      |
|             | 3 out of 5                 | NA                                                                                                                                                       |
| LWW24       | 5 out of 5                 | NA                                                                                                                                                       |
| LWW25       | 5 out of 5                 | NA                                                                                                                                                       |
| LWW26       | 3 out of 5                 | Homo sapiens cortactin (CTTN), transcript variant 1, mRNA                                                                                                |
|             | 2 out of 5                 | NA                                                                                                                                                       |
| LWW27       | 2 out of 5                 | Homo sapiens plasminogen (PLG), mRNA                                                                                                                     |
|             | 3 out of 5                 | NA                                                                                                                                                       |
| LWW28       | 1 out of 5                 | Homo sapiens M-phase phosphoprotein 6 (MPHOSPH6), mRNA                                                                                                   |
|             | 4 out of 5                 | NA                                                                                                                                                       |
| LWW29       | 1 out of 5                 | high-mobility group nucleosomal binding domain 2 (HMGN2)                                                                                                 |
|             | 1 out of 5                 | Homo sapiens eukaryotic translation initiation factor 2, subunit 3 gamma, 52kDa (EIF2S3), mRNA                                                           |
|             | 3 out of 5                 | NA                                                                                                                                                       |
| LWW30       | 1 out of 5                 | Homo sapiens chromosome 1 open reading frame 149 (C1orf149)                                                                                              |
|             | 4 out of 5                 | NA                                                                                                                                                       |
| LWW31       | 2 out of 10                | Homo sapiens nuclear casein kinase and cyclin-dependent                                                                                                  |

|       |             |                                                                                                                                                                          |
|-------|-------------|--------------------------------------------------------------------------------------------------------------------------------------------------------------------------|
|       |             | kinase substrate 1 (NUCKS1)                                                                                                                                              |
|       | 4 out of 10 | Homo sapiens eukaryotic translation initiation factor 5B (EIF5B)                                                                                                         |
|       | 1 out of 10 | Homo sapiens KRR1, small subunit (SSU) processome component, homolog (yeast) (KRR1)                                                                                      |
|       | 3 out of 10 | NA                                                                                                                                                                       |
| LWW32 | 3 out of 10 | Homo sapiens high-mobility group box 3 (HMGB3)                                                                                                                           |
|       | 3 out of 10 | Homo sapiens nucleolar and coiled-body phosphoprotein 1 (NOLC1)                                                                                                          |
|       | 4 out of 10 | NA                                                                                                                                                                       |
| LWW33 | 5 out of 5  | Homo sapiens topoisomerase (DNA) I (TOP1)                                                                                                                                |
| LWW34 | 5 out of 5  | NA                                                                                                                                                                       |
| LWW36 | 3 out of 5  | Homo sapiens nucleolar and coiled-body phosphoprotein 1 (NOLC1)                                                                                                          |
|       | 2 out of 5  | NA                                                                                                                                                                       |
| LWW37 | 5 out of 5  | NA                                                                                                                                                                       |
| LWW39 | 5 out of 5  | NA                                                                                                                                                                       |
| LWW40 | 1 out of 5  | Deformed epidermal autoregulatory factor 1 homolog (Nuclear DEAF-1-related transcriptional regulator) (NUDR) (Suppressin) (Zinc finger MYND domain-containing protein 5) |
|       | 4 out of 5  | NA                                                                                                                                                                       |
| LWW41 | 5 out of 5  | NA                                                                                                                                                                       |
| LWW42 | 5 out of 5  | NA                                                                                                                                                                       |
| LWW43 | 5 out of 5  | NA                                                                                                                                                                       |
| LWW44 | 5 out of 5  | NA                                                                                                                                                                       |
| LWW45 | 5 out of 5  | NA                                                                                                                                                                       |
| LWW46 | 5 out of 5  | NA                                                                                                                                                                       |
| LWW47 | 5 out of 5  | NA                                                                                                                                                                       |
| LWW48 | 5 out of 5  | NA                                                                                                                                                                       |
| LWW49 | 5 out of 5  | NA                                                                                                                                                                       |
| LWW50 | 5 out of 5  | NA                                                                                                                                                                       |
| LWW51 | 5 out of 5  | NA                                                                                                                                                                       |
| LWW53 | 5 out of 5  | NA                                                                                                                                                                       |
| LWW55 | 1 out of 10 | Homo sapiens UTP14, U3 small nucleolar ribonucleoprotein, homolog A (yeast) (UTP14A),                                                                                    |
|       | 1 out of 10 | p40                                                                                                                                                                      |
|       | 8 out of 19 | NA                                                                                                                                                                       |
| LWW58 | 2 out of 5  | serum albumin [Homo sapiens]                                                                                                                                             |
|       | 1 out of 5  | sarcoma antigen NY-SAR-91 [Homo sapiens]                                                                                                                                 |
|       | 2 out of 5  | NA                                                                                                                                                                       |
| LWW60 | 2 out of 5  | sarcoma antigen NY-SAR-91 [Homo sapiens]                                                                                                                                 |
|       | 1 out of 5  | hCG1820635 [Homo sapiens]                                                                                                                                                |
|       | 2 out of 5  | NA                                                                                                                                                                       |
| LWW64 | 5 out of 5  | NA                                                                                                                                                                       |
| LWW65 | 1 out of 5  | ferritin light polypeptide variant [Homo sapiens]                                                                                                                        |
|       | 1 out of 5  | aftiphilin protein isoform a [Homo sapiens]                                                                                                                              |
|       | 3 out of 5  | NA                                                                                                                                                                       |
| LWW66 | 4 out of 10 | KIAA0081 [Homo sapiens]                                                                                                                                                  |
|       | 1 out of 10 | mesoderm development candidate 2 [Homo sapiens]                                                                                                                          |
|       | 2 out of 10 | high-mobility group box 3, isoform CRA_b [Homo sapiens].                                                                                                                 |
|       | 1 out of 10 | coilin [Homo sapiens]                                                                                                                                                    |
|       | 2 out of 10 | NA                                                                                                                                                                       |
| LWW69 | 5 out of 5  | NA                                                                                                                                                                       |
| LWW70 | 2 out of 5  | zinc finger protein 354B [Homo sapiens]                                                                                                                                  |
|       | 3 out of 5  | NA                                                                                                                                                                       |
| LWW72 | 3 out of 5  | zinc finger protein 354B [Homo sapiens]                                                                                                                                  |
|       | 2 out of 5  | NA                                                                                                                                                                       |
| LWW73 | 5 out of 5  | NA                                                                                                                                                                       |





Figure S1.

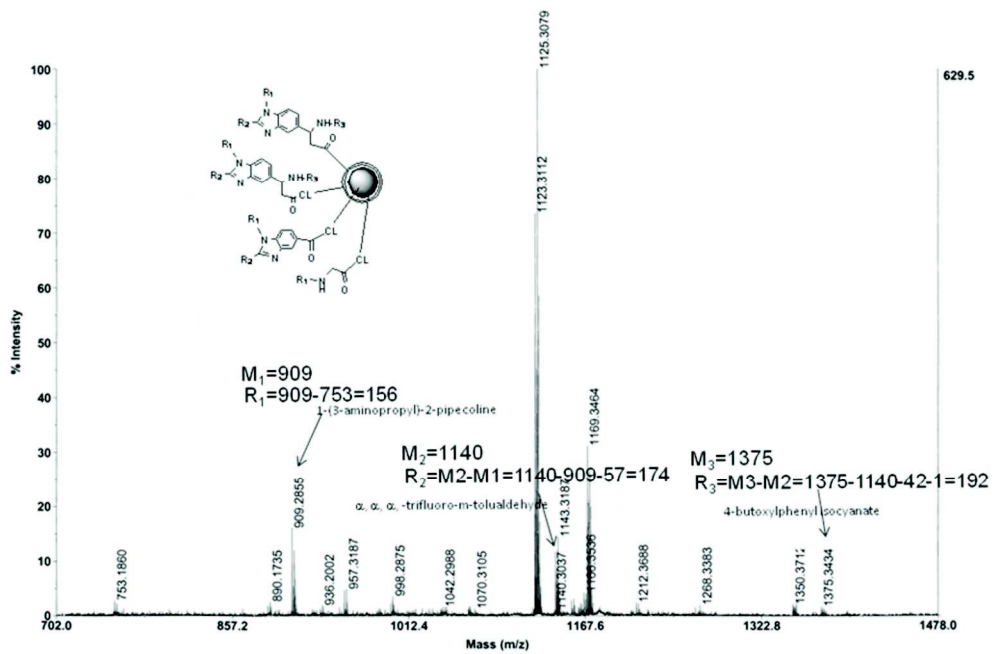

Figure S2.

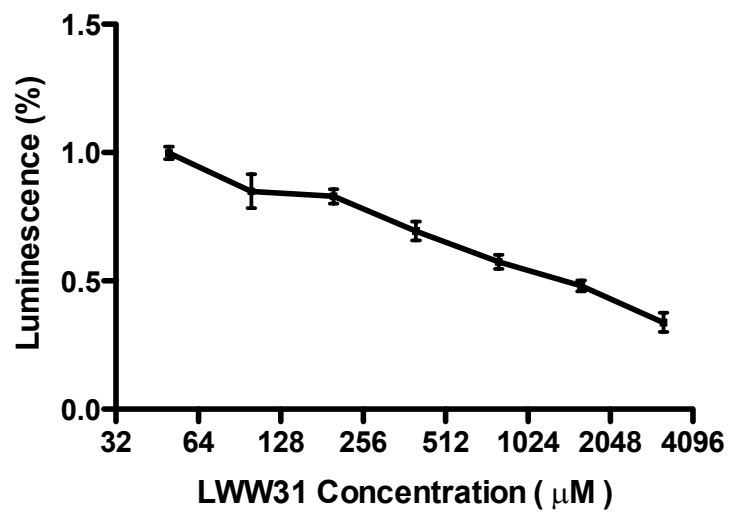

Supplement: co5b00194_si_001.pdf [file co5b00194_si_001.pdf]
